# Supplementary material for: A Mouse-Specific Model to Detect Genes under Selection in Tumors
Source: MDPI journal article supplement (doi:10.3390/cancers15215156), 2023-10-26
Supplement: s1 [file s1]

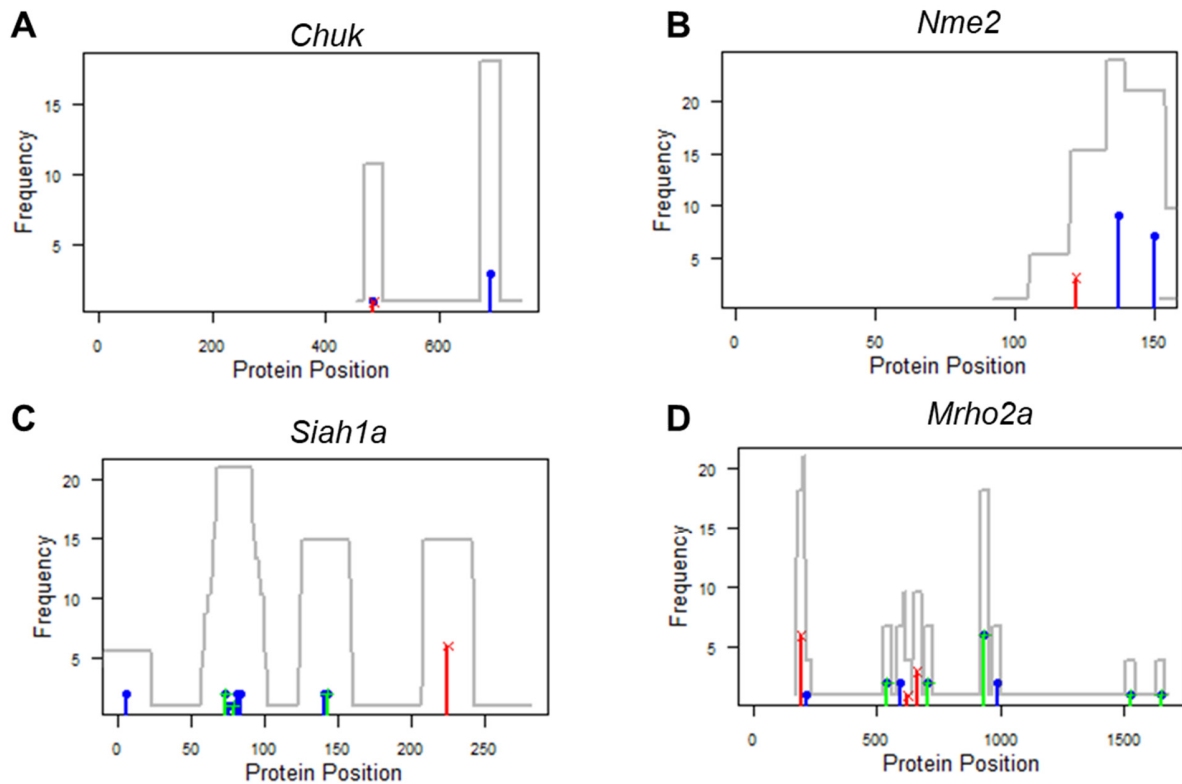

**Supplementary Figure S1.** Distribution of mutations in genes with discrepant predictions by the GUST-mouse model and the 20/20 rule. (A,B) Current literature supports the *Chuk* gene and the *Nme2* gene as TSGs, consistent with the GUST-mouse prediction. These two genes had missense (blue bars) and truncating mutations (red bars). However, the 20/20 rule classified the *Chuk* gene as a PG and the *Nme2* gene as an OG. (C,D) The *Siah1a* and *Mrho2a* were predicted as PGs by the GUST-mouse model, but as TSGs by the 20/20 rule. These two genes have abundant synonymous mutations (green bars).

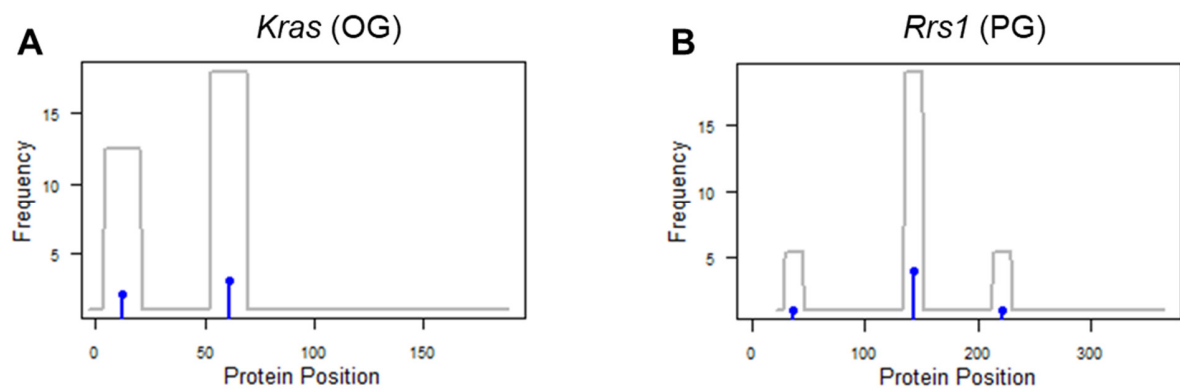

**Supplementary Figure S2.** Distribution of mutations in genes detected in the mouse lung cancer models. (A) GUST-mouse predicted the *Kras* gene as an OG. (B) GUST-mouse predicted the *Rrs1* gene as a PG.
