# Supplementary material for: A Mouse-Specific Model to Detect Genes under Selection in Tumors
Source: Cancers (Basel). 2023 Oct 26;15(21):5156. doi: 10.3390/cancers15215156 (PMC10647215; doi:10.3390/cancers15215156)
Supplement: Supplementary file 1 [file cancers-15-05156-s001.zip › Supplementary Table S1.xlsx]

## Sheet: bc_leu.predictions.type.20_20
Symbol	Silent	Missense	Nonsense	Indel.fs	Indel.inframe	E.gene	E.summit	Ensembl.gene	Sel.missense	Sel.truncating	R.missense	R.truncating	R.peak	R.summit	C.summit	R.length	GUST.pred	GUST.prob	Human.Ortholog	subset	20/20 Rule
Ddx42	0	14	0	0	0	0	0	ENSMUSG00000020705	5	-5	1	0	1	1	14	0	OG	0.995	DDX42	mmLKM	OG
Zcchc4	0	14	0	0	0	0	0	ENSMUSG00000029179	5	-5	1	0	1	1	14	0	OG	0.995	ZCCHC4	mmLKM	OG
Riox2	0	12	0	0	0	0.092	0.092	ENSMUSG00000022724	5	-4.99	1	0	1	1	12	0	OG	0.99		mmLKM	OG
Trav7-6	0	15	0	0	0	0.352	0.352	ENSMUSG00000096138	5	-4.99	1	0	1	1	15	0	OG	0.98		mmLKM	OG
Ubqln5	0	14	0	0	0	0.352	0.352	ENSMUSG00000055643	5	-4.6	1	0	1	1	14	0	OG	0.98		mmLKM	OG
Cyp2u1	0	13	0	0	0	1.211	1.211	ENSMUSG00000027983	5	-5	1	0	1	1	13	0	OG	0.965	CYP2U1	mmLKM	OG
Pram1	0	10	0	0	0	0.352	0.352	ENSMUSG00000032739	5	-5	1	0	1	1	10	0	OG	0.952	PRAM1	mmLKM	OG
Tbc1d2b	0	10	0	0	0	0.352	0.352	ENSMUSG00000037410	5	-5	1	0	1	1	10	0	OG	0.952	TBC1D2B	mmLKM	OG
Dpagt1	0	10	0	0	0	0.87	0.87	ENSMUSG00000032123	5	-5	1	0	1	1	10	0	OG	0.937	DPAGT1	mmLKM	OG
Eef2	0	7	0	0	0	0	0	ENSMUSG00000034994	5	-5	1	0	1	1	7	0	OG	0.847	EEF2	mmLKM	OG
Ankrd13a	0	8	0	0	0	0.098	0.098	ENSMUSG00000041870	5	-5	1	0	1	1	8	0	OG	0.839	ANKRD13A	mmLKM	OG
Gcgr	0	7	0	0	0	0.352	0.352	ENSMUSG00000025127	5	-5	1	0	1	1	7	0	OG	0.819	GCGR	mmLKM	OG
Sult2a6	0	8	0	0	0	0.352	0.352	ENSMUSG00000070810	5	-5	1	0	1	1	8	0	OG	0.819		mmLKM	OG
Zfp987	0	7	0	0	0	0.352	0.352	ENSMUSG00000066009	5	-5	1	0	1	1	7	0	OG	0.819		mmLKM	OG
Pum1	0	12	0	0	0	0.352	0.352	ENSMUSG00000028580	5	-5	1	0	0.92	0.92	11	0	OG	0.756	PUM1	mmLKM	OG
Zmym6	0	6	0	0	0	0.352	0.352	ENSMUSG00000042408	5	-5	1	0	1	1	6	0	OG	0.744	ZMYM6	mmLKM	OG
Ankrd33b	7	0	0	0	0	0.352	0.352	ENSMUSG00000022237	-5	-5	0	0	0	0	0	0	PG	0.982		mmLKM	PG
Lrrc19	7	0	0	0	0	0.352	0.352	ENSMUSG00000049799	-5	-5	0	0	0	0	0	0	PG	0.982	LRRC19	mmLKM	PG
Naip5	8	0	0	0	0	0.352	0.352	ENSMUSG00000071203	-5	-5	0	0	0	0	0	0	PG	0.982		mmLKM	PG
Nsd1	8	0	0	0	0	0.352	0.352	ENSMUSG00000021488	-4.95	-5	0	0	0	0	0	0	PG	0.982	NSD1	mmLKM	PG
Nup98	8	0	0	0	0	0.352	0.352	ENSMUSG00000063550	-5	-5	0	0	0	0	0	0	PG	0.982	362	mmLKM	PG
Phf23	15	0	0	0	0	0.352	0.352	ENSMUSG00000018572	-5	-5	0	0	0	0	0	0	PG	0.982	PHF23	mmLKM	PG
Ptch1	11	0	0	0	0	0.352	0.352	ENSMUSG00000021466	-5	-5	0	0	0	0	0	0	PG	0.982	406	mmLKM	PG
Stambpl1	5	0	0	0	0	0.352	0.352	ENSMUSG00000024776	-4.95	-5	0	0	0	0	0	0	PG	0.982		mmLKM	PG
Ston2	8	0	0	0	0	0.352	0.352	ENSMUSG00000020961	-5	-5	0	0	0	0	0	0	PG	0.982	STON2	mmLKM	PG
Zc3h12c	10	0	0	0	0	0.352	0.352	ENSMUSG00000035164	-4.95	-5	0	0	0	0	0	0	PG	0.982	ZC3H12C	mmLKM	PG
Prl2c1	0	0	8	0	0	0.352	0.352	ENSMUSG00000062551	-5	5	0	1	0	0	0	0.01	TSG	0.862		mmLKM	TSG
Macroh2a2	0	14	0	0	0	0.059	0.059	ENSMUSG00000020086	5	-5	1	0	1	1	14	0	OG	0.992	H2AFY2	mmBRCA(PyMT)	OG
Ybx1	0	12	0	0	0	0.21	0.21	ENSMUSG00000028639	5	-5	1	0	1	1	12	0	OG	0.985	YBX1	mmBRCA(PyMT)	OG
Fbxo5	0	26	0	0	0	0.304	0.304	ENSMUSG00000019773	5	-5	1	0	1	1	26	0	OG	0.98	FBXO5	mmBRCA(PyMT)	OG
Nudt15	0	12	0	0	0	0.409	0.409	ENSMUSG00000033405	5	-4.61	1	0	1	1	12	0	OG	0.975	NUDT15	mmBRCA(PyMT)	OG
Fam205c	0	14	0	0	0	0.481	0.481	ENSMUSG00000050141	5	-5	1	0	1	1	14	0	OG	0.97		mmBRCA(PyMT)	OG
Cfh4	0	12	0	0	0	0.481	0.481	ENSMUSG00000070594	5	-5	1	0	1	1	12	0	OG	0.97	CFH	mmBRCA(PyMT)	OG
Sbpl	0	16	0	0	0	0.481	0.481	ENSMUSG00000024125	5	-5	1	0	1	1	16	0	OG	0.97		mmBRCA(PyMT)	OG
Marchf5	0	10	0	0	0	0	0	ENSMUSG00000023307	5	-5	1	0	1	1	10	0	OG	0.967	2023-03-05	mmBRCA(PyMT)	OG
A430005L14Rik	0	17	0	0	0	1.579	1.579	ENSMUSG00000047613	5	-4.6	1	0	1	1	17	0	OG	0.965	C1orf174	mmBRCA(PyMT)	OG
Itgad	0	13	0	0	0	1.729	1.729	ENSMUSG00000070369	5	-5	1	0	1	1	13	0	OG	0.965	ITGAD	mmBRCA(PyMT)	OG
Glul	0	11	0	0	0	0.257	0.257	ENSMUSG00000026473	5	-5	1	0	1	1	11	0	OG	0.957	GLUL	mmBRCA(PyMT)	OG
Kng2	0	9	0	0	0	0.587	0.587	ENSMUSG00000060459	5	-5	1	0	1	1	9	0	OG	0.942	KNG1	mmBRCA(PyMT)	OG
Zfp970	0	24	0	0	0	0.481	0.481	ENSMUSG00000078866	5	-5	1	0	1	0.88	21	0	OG	0.879		mmBRCA(PyMT)	OG
Psg21	0	21	0	0	0	0.481	0.481	ENSMUSG00000070796	5	-5	1	0	1	0.62	13	0	OG	0.847		mmBRCA(PyMT)	OG
Sh2d1b1	0	8	0	0	0	0	0	ENSMUSG00000102418	5	-4.99	1	0	1	1	8	0	OG	0.847	SH2D1B	mmBRCA(PyMT)	OG
Trim43b	0	21	0	0	0	0.481	0.481	ENSMUSG00000079162	5	-5	1	0	1	0.57	12	0	OG	0.847		mmBRCA(PyMT)	OG
Ivl	0	8	0	0	0	0.481	0.481	ENSMUSG00000049128	5	-5	1	0	1	1	8	0	OG	0.809	IVL	mmBRCA(PyMT)	OG
Nup93	0	7	0	0	0	0.481	0.481	ENSMUSG00000032939	5	-5	1	0	1	1	7	0	OG	0.809	NUP93	mmBRCA(PyMT)	OG
Plscr1	0	8	0	0	0	0.481	0.481	ENSMUSG00000032369	5	-5	1	0	1	1	8	0	OG	0.809		mmBRCA(PyMT)	OG
Rbbp5	0	16	0	0	0	0.481	0.481	ENSMUSG00000026439	5	-5	1	0	1	0.56	9	0	OG	0.809	RBBP5	mmBRCA(PyMT)	OG
Olfr380	0	7	0	0	0	0.73	0.73	ENSMUSG00000072709	5	-5	1	0	1	1	7	0	OG	0.802	OR1E2	mmBRCA(PyMT)	OG
Ugt1a10	0	8	0	0	0	1.074	1.074	ENSMUSG00000090165	5	-5	1	0	1	1	8	0	OG	0.802	UGT1A8	mmBRCA(PyMT)	OG
Eef2	0	6	0	0	0	0.06	0.06	ENSMUSG00000034994	5	-5	1	0	1	1	6	0	OG	0.766	EEF2	mmBRCA(PyMT)	OG
2700062C07Rik	0	5	0	0	0	0	0	ENSMUSG00000024273	5	-5	1	0	1	1	5	0	OG	0.761	C18orf21	mmBRCA(PyMT)	OG
Spink7	0	5	0	0	0	0	0	ENSMUSG00000060201	5	-5	1	0	1	1	5	0	OG	0.761	SPINK7	mmBRCA(PyMT)	OG
Lama2	0	10	0	0	0	0.366	0.407	ENSMUSG00000019899	5	-5	1	0	0.9	0.9	9	0	OG	0.736	LAMA2	mmBRCA(PyMT)	OG
Adam9	0	6	0	0	0	0.481	0.481	ENSMUSG00000031555	5	-5	1	0	1	1	6	0	OG	0.734	ADAM9	mmBRCA(PyMT)	OG
Vmn2r82	0	6	0	0	0	0.481	0.481	ENSMUSG00000091468	5	-5	1	0	1	1	6	0	OG	0.734		mmBRCA(PyMT)	OG
Ifna5	0	6	0	0	0	0.709	0.709	ENSMUSG00000096682	5	-5	1	0	1	1	6	0	OG	0.726	IFNA8	mmBRCA(PyMT)	OG
Prss2	0	6	0	0	0	0.956	0.956	ENSMUSG00000057163	5	-4.99	1	0	1	1	6	0	OG	0.726	PRSS1	mmBRCA(PyMT)	OG
B3gnt4	1	25	0	0	0	0.528	0.528	ENSMUSG00000029431	2.09	-5	0.96	0	1	1	25	0	OG	0.724	B3GNT4	mmBRCA(PyMT)	OG
B020004J07Rik	0	5	0	0	0	0.481	0.481	ENSMUSG00000035201	5	-5	1	0	1	1	5	0	OG	0.721		mmBRCA(PyMT)	OG
Il33	0	5	0	0	0	0.581	0.581	ENSMUSG00000024810	5	-4.6	1	0	1	1	5	0	OG	0.721	IL33	mmBRCA(PyMT)	OG
Pcdhb18	0	5	0	0	0	0.555	0.555	ENSMUSG00000048347	5	-5	1	0	1	1	5	0	OG	0.721	PCDHB10	mmBRCA(PyMT)	OG
Simc1	0	5	0	0	0	0.481	0.481	ENSMUSG00000043183	5	-5	1	0	1	1	5	0	OG	0.721		mmBRCA(PyMT)	OG
Cnot3	0	5	0	0	0	1.074	1.074	ENSMUSG00000035632	5	-5	1	0	1	1	5	0	OG	0.714	118	mmBRCA(PyMT)	OG
Efhb	0	10	0	0	0	0.588	0.655	ENSMUSG00000023931	5	-5	1	0	1	0.8	8	0	OG	0.714	EFHB	mmBRCA(PyMT)	OG
Olfr584	0	5	0	0	0	0.906	0.906	ENSMUSG00000073959	5	-5	1	0	1	1	5	0	OG	0.714		mmBRCA(PyMT)	OG
Sh2d5	0	5	0	0	0	0.817	0.817	ENSMUSG00000045349	5	-5	1	0	1	1	5	0	OG	0.714	SH2D5	mmBRCA(PyMT)	OG
Adam34l	0	13	0	0	0	0.481	0.481	ENSMUSG00000050190	5	-5	1	0	1	0.54	7	0	OG	0.709		mmBRCA(PyMT)	OG
Cdk12	0	8	0	0	0	0.481	0.481	ENSMUSG00000003119	5	-4.99	1	0	1	0.75	6	0	OG	0.648	100	mmBRCA(PyMT)	OG
Gm14409	0	11	0	0	0	0.481	0.481	ENSMUSG00000078869	5	-5	1	0	1	0.55	6	0	OG	0.643		mmBRCA(PyMT)	OG
Zfp982	1	10	0	0	0	0.481	0.481	ENSMUSG00000078496	2.21	-5	0.91	0	1	0.9	9	0	OG	0.641		mmBRCA(PyMT)	OG
AY358078	0	5	0	0	0	0.481	0.481	ENSMUSG00000050961	5	-5	1	0	1	0.8	4	0	OG	0.558		mmBRCA(PyMT)	OG
Vmn1r76	2	17	0	0	0	0.481	0.481	ENSMUSG00000115267	1.52	-5	0.89	0	1	0.76	13	0	OG	0.558		mmBRCA(PyMT)	OG
Gon4l	0	8	0	0	0	0.587	0.402	ENSMUSG00000054199	5	-4.6	1	0	0.88	0.88	7	0	OG	0.545		mmBRCA(PyMT)	OG
Muc4	4	11	0	0	0	0.481	0.481	ENSMUSG00000079620	0.28	-5	0.73	0	0.45	0.27	3	0	PG	1	328	mmBRCA(PyMT)	PG
Armh4	3	2	0	0	0	0.984	0.984	ENSMUSG00000036242	-1.23	-5	0.4	0	0	0.5	0	0	PG	0.997	C14orf37	mmBRCA(PyMT)	PG
Fus	4	6	0	0	0	0.148	0	ENSMUSG00000030795	-0.52	-5	0.6	0	0.5	0.5	3	0	PG	0.997	219	mmBRCA(PyMT)	OG
Mug1	5	6	0	0	0	0.481	0.481	ENSMUSG00000059908	-0.93	-5	0.55	0	0.5	0.5	3	0	PG	0.997		mmBRCA(PyMT)	OG
Gm3642	2	3	0	0	0	0.481	0.481	ENSMUSG00000096685	0.01	-5	0.6	0	0.67	0.67	2	0	PG	0.992		mmBRCA(PyMT)	PG
Gm5592	2	3	0	0	0	0.481	0.481	ENSMUSG00000072259	-0.19	-5	0.6	0	0.67	0.67	2	0	PG	0.992		mmBRCA(PyMT)	PG
Gm9376	2	3	0	0	0	0.481	0.481	ENSMUSG00000092109	-0.02	-5	0.6	0	0.67	0.67	2	0	PG	0.992		mmBRCA(PyMT)	PG
Olfr488	2	3	0	0	0	0.747	0.653	ENSMUSG00000096465	-0.64	-5	0.6	0	0.67	0.67	2	0	PG	0.992	OR5P2	mmBRCA(PyMT)	PG
Zfp65	2	3	0	0	0	0.481	0.481	ENSMUSG00000071281	-0.86	-5	0.6	0	0.67	0.67	2	0	PG	0.992		mmBRCA(PyMT)	PG
Ldhb	2	3	0	0	0	0.028	0.042	ENSMUSG00000030246	-0.27	-5	0.6	0	0.67	0.67	2	0	PG	0.99	LDHB	mmBRCA(PyMT)	PG
Vmn2r100	4	2	0	0	0	0.481	0.481	ENSMUSG00000091859	-1.57	-5	0.33	0	0	0.5	0	0	PG	0.99		mmBRCA(PyMT)	PG
Camsap1	7	2	0	0	0	0.462	0.462	ENSMUSG00000026933	-2.08	-5	0.22	0	0	0.5	0	0	PG	0.987	CAMSAP1	mmBRCA(PyMT)	PG
Vmn2r75	8	3	0	0	0	0.481	0.481	ENSMUSG00000090436	-2.59	-5	0.27	0	0.67	0.67	2	0	PG	0.987		mmBRCA(PyMT)	PG
Afdn	7	0	0	0	1	0.481	0.481	ENSMUSG00000068036	-5	-5	0	0	0	0	0	0	PG	0.985		mmBRCA(PyMT)	PG
Ccnd3	14	0	0	0	13	0.481	0.481	ENSMUSG00000034165	-5	-5	0	0	0	0	0	0	PG	0.985	86	mmBRCA(PyMT)	PG
Enah	8	0	0	0	0	0.481	0.481	ENSMUSG00000022995	-5	-5	0	0	0	0	0	0	PG	0.985	ENAH	mmBRCA(PyMT)	PG
Gm10142	7	0	0	0	0	0.481	0.481	ENSMUSG00000094146	-4.95	-5	0	0	0	0	0	0	PG	0.985		mmBRCA(PyMT)	PG
Gm10436	7	0	0	0	0	0.481	0.481	ENSMUSG00000066027	-5	-5	0	0	0	0	0	0	PG	0.985		mmBRCA(PyMT)	PG
Gm14393	15	0	0	0	0	0.481	0.481	ENSMUSG00000078905	-5	-5	0	0	0	0	0	0	PG	0.985		mmBRCA(PyMT)	PG
Ifi203	9	0	0	0	0	0.481	0.481	ENSMUSG00000039997	-5	-5	0	0	0	0	0	0	PG	0.985		mmBRCA(PyMT)	PG
Itga6	8	0	0	0	0	0.481	0.481	ENSMUSG00000027111	-5	-5	0	0	0	0	0	0	PG	0.985		mmBRCA(PyMT)	PG
Kmt2d	4	0	0	0	5	0.481	0.481	ENSMUSG00000048154	-5	-5	0	0	0	0	0	0	PG	0.985	278	mmBRCA(PyMT)	PG
Naip1	6	0	0	0	0	0.481	0.481	ENSMUSG00000021640	-5	-5	0	0	0	0	0	0	PG	0.985		mmBRCA(PyMT)	PG
Olfr1028	15	0	0	0	0	0.481	0.481	ENSMUSG00000057207	-5	-5	0	0	0	0	0	0	PG	0.985	OR5M10	mmBRCA(PyMT)	PG
Olfr118	8	0	0	0	0	0.481	0.481	ENSMUSG00000080990	-5	-5	0	0	0	0	0	0	PG	0.985		mmBRCA(PyMT)	PG
Olfr1348	29	0	0	0	0	0.481	0.481	ENSMUSG00000093877	-5	-5	0	0	0	0	0	0	PG	0.985		mmBRCA(PyMT)	PG
Olfr1480	15	0	0	0	0	0.481	0.481	ENSMUSG00000095484	-4.95	-5	0	0	0	0	0	0	PG	0.985		mmBRCA(PyMT)	PG
Olfr212	26	0	0	0	0	0.481	0.481	ENSMUSG00000053251	-5	-5	0	0	0	0	0	0	PG	0.985		mmBRCA(PyMT)	PG
Olfr27	7	0	0	0	0	0.481	0.481	ENSMUSG00000049708	-4.95	-5	0	0	0	0	0	0	PG	0.985		mmBRCA(PyMT)	PG
Olfr93	10	0	0	0	0	0.481	0.481	ENSMUSG00000091601	-4.95	-5	0	0	0	0	0	0	PG	0.985		mmBRCA(PyMT)	PG
Olfr970	11	0	0	0	0	0.481	0.481	ENSMUSG00000095774	-5	-5	0	0	0	0	0	0	PG	0.985	OR8G1	mmBRCA(PyMT)	PG
Pcdha7	6	0	0	0	0	0.481	0.481	ENSMUSG00000104318	-5	-5	0	0	0	0	0	0	PG	0.985	PCDHA7	mmBRCA(PyMT)	PG
Prps1l3	7	0	0	0	0	0.481	0.481	ENSMUSG00000079104	-5	-5	0	0	0	0	0	0	PG	0.985	PRPS1	mmBRCA(PyMT)	PG
Rrbp1	6	3	0	0	0	0.481	0.481	ENSMUSG00000027422	-1.39	-5	0.33	0	0.67	0.67	2	0	PG	0.985		mmBRCA(PyMT)	PG
Trav6d-4	20	0	0	0	0	0.481	0.481	ENSMUSG00000095387	-4.95	-5	0	0	0	0	0	0	PG	0.985		mmBRCA(PyMT)	PG
Treml2	11	0	0	0	0	0.481	0.481	ENSMUSG00000071068	-5	-5	0	0	0	0	0	0	PG	0.985	TREML2	mmBRCA(PyMT)	PG
Tuba3b	13	0	0	0	0	0.481	0.481	ENSMUSG00000067338	-5	-5	0	0	0	0	0	0	PG	0.985		mmBRCA(PyMT)	PG
Twistnb	7	0	0	0	0	0.481	0.481	ENSMUSG00000020561	-5	-5	0	0	0	0	0	0	PG	0.985	TWISTNB	mmBRCA(PyMT)	PG
Ugt1a1	9	0	0	0	0	0.481	0.481	ENSMUSG00000089960	-4.95	-5	0	0	0	0	0	0	PG	0.985	UGT1A1	mmBRCA(PyMT)	PG
Vmn2r111	8	0	0	0	1	0.481	0.481	ENSMUSG00000095093	-5	-5	0	0	0	0	0	0	PG	0.985		mmBRCA(PyMT)	PG
Vmn2r117	7	3	0	0	0	0.481	0.481	ENSMUSG00000091407	-1.51	-5	0.3	0	0.67	0.67	2	0	PG	0.985		mmBRCA(PyMT)	PG
Zfp69	9	0	0	0	1	0.481	0.481	ENSMUSG00000064141	-5	-5	0	0	0	0	0	0	PG	0.985	ZFP69	mmBRCA(PyMT)	PG
D1Ertd622e	3	4	0	0	0	0.475	0.465	ENSMUSG00000044768	-0.7	-5	0.57	0	0.75	0.75	3	0	PG	0.98	C5orf30	mmBRCA(PyMT)	OG
Hjurp	4	4	0	0	1	0.995	0.928	ENSMUSG00000044783	-0.75	-5	0.44	0	0.75	0.75	3	0	PG	0.98	HJURP	mmBRCA(PyMT)	OG
H2-T23	3	6	0	0	0	0.406	0	ENSMUSG00000067212	0.13	-5	0.67	0	0.83	0.5	3	0	PG	0.975	HLA-E	mmBRCA(PyMT)	OG
Ahnak	13	1	0	0	0	0.481	0.481	ENSMUSG00000069833	-3.32	-5	0.07	0	0	1	0	0	PG	0.972	AHNAK	mmBRCA(PyMT)	PG
Itln1	31	1	0	0	0	1.05	1.05	ENSMUSG00000038209	-5	-5	0.03	0	0	1	0	0	PG	0.972	ITLN1	mmBRCA(PyMT)	PG
Olfr1487	7	1	0	0	0	0.481	0.481	ENSMUSG00000094846	-2.46	-5	0.12	0	0	1	0	0	PG	0.972		mmBRCA(PyMT)	PG
Phf11a	4	1	0	0	0	0.481	0.481	ENSMUSG00000044703	-2.96	-5	0.2	0	0	1	0	0	PG	0.972		mmBRCA(PyMT)	PG
Vmn2r54	6	1	0	0	0	0.481	0.481	ENSMUSG00000096593	-2.63	-5	0.14	0	0	1	0	0	PG	0.972		mmBRCA(PyMT)	PG
H1f2	5	1	0	0	0	0	0	ENSMUSG00000036181	-2.83	-5	0.17	0	0	1	0	0	PG	0.97	HIST1H1C	mmBRCA(PyMT)	PG
Klra4	4	1	0	0	0	0.481	0.481	ENSMUSG00000079852	-1.89	-5	0.2	0	0	1	0	0	PG	0.97		mmBRCA(PyMT)	PG
Olfr836	6	1	0	0	0	0.481	0.481	ENSMUSG00000059303	-2.35	-5	0.14	0	0	1	0	0	PG	0.97		mmBRCA(PyMT)	PG
Otud4	5	1	0	0	1	0	0	ENSMUSG00000036990	-2.69	-5	0.14	0	0	1	0	0	PG	0.97		mmBRCA(PyMT)	PG
Rpsa	16	1	0	0	0	0.106	0.106	ENSMUSG00000032518	-3.41	-5	0.06	0	0	1	0	0	PG	0.97	RPSA	mmBRCA(PyMT)	PG
Fbxo34	10	7	0	0	0	0.302	0	ENSMUSG00000037536	-0.93	-5	0.41	0	0.86	0.57	4	0	PG	0.95		mmBRCA(PyMT)	OG
Dll3	0	0	0	0	5	0.481	0.481	ENSMUSG00000003436	2.85	0	0	0	0	0	0	0	PG	0.945		mmBRCA(PyMT)	PG
Gm10153	0	0	0	0	7	0.481	0.481	ENSMUSG00000066101	2.85	0	0	0	0	0	0	0	PG	0.945		mmBRCA(PyMT)	PG
H2-T3	0	0	0	0	9	0.481	0.481	ENSMUSG00000054128	2.85	0	0	0	0	0	0	0	PG	0.945		mmBRCA(PyMT)	PG
Hspa8	0	0	0	0	6	0.481	0.481	ENSMUSG00000015656	2.85	0	0	0	0	0	0	0	PG	0.945		mmBRCA(PyMT)	PG
Krtap4-9	0	0	0	0	7	0.481	0.481	ENSMUSG00000078262	2.85	0	0	0	0	0	0	0	PG	0.945		mmBRCA(PyMT)	PG
Nup54	0	0	0	0	9	0.481	0.481	ENSMUSG00000034826	2.85	0	0	0	0	0	0	0	PG	0.945	NUP54	mmBRCA(PyMT)	PG
Tex19.1	0	0	0	0	5	0.481	0.481	ENSMUSG00000039329	2.85	0	0	0	0	0	0	0	PG	0.945		mmBRCA(PyMT)	PG
Tob1	0	0	0	0	6	0.481	0.481	ENSMUSG00000037573	2.85	0	0	0	0	0	0	0	PG	0.945		mmBRCA(PyMT)	PG
Cherp	2	1	0	1	24	0	0	ENSMUSG00000052488	-2.28	-3.88	0.04	0.04	0	1	0	0.86	PG	0.905	CHERP	mmBRCA(PyMT)	PG
2410141K09Rik	6	13	0	0	0	0.481	0.481	ENSMUSG00000074832	-0.53	-5	0.68	0	0.92	0.31	4	0	PG	0.894		mmBRCA(PyMT)	OG
Vmn2r94	5	0	0	1	0	0.481	0.481	ENSMUSG00000090417	-5	-0.74	0	0.17	0	0	0	0.37	PG	0.894		mmBRCA(PyMT)	PG
Ryr1	1	0	0	1	4	0.481	0.481	ENSMUSG00000030592	-5	-2.09	0	0.17	0	0	0	0.89	PG	0.889	RYR1	mmBRCA(PyMT)	PG
Metap2	5	7	0	0	0	0	0	ENSMUSG00000036112	-0.31	-5	0.58	0	0.71	0.71	5	0	PG	0.882	METAP2	mmBRCA(PyMT)	OG
Zc3h14	2	8	0	1	0	0.282	0.09	ENSMUSG00000021012	0.48	-0.03	0.73	0.09	0.62	0.38	3	0.27	PG	0.879	ZC3H14	mmBRCA(PyMT)	OG
Rptn	2	6	0	0	0	0.481	0.481	ENSMUSG00000041984	0.2	-5	0.75	0	0.83	0.83	5	0	PG	0.867		mmBRCA(PyMT)	OG
Gm20509	0	5	0	0	2	0.481	0.481	ENSMUSG00000092310	5	-5	0.71	0	0.8	0.8	4	0	PG	0.862		mmBRCA(PyMT)	OG
Cdyl	3	7	0	0	0	0.088	0.058	ENSMUSG00000059288	0.35	-5	0.7	0	0.86	0.86	6	0	PG	0.859		mmBRCA(PyMT)	OG
Thegl	0	0	0	1	6	0.481	0.481	ENSMUSG00000029248	1.54	0	0	0.14	0	0	0	0.18	PG	0.844		mmBRCA(PyMT)	PG
Zfp119a	2	4	0	0	0	0.481	0.481	ENSMUSG00000057835	-0.43	-5	0.67	0	1	0.5	2	0	PG	0.824		mmBRCA(PyMT)	PG
Tk1	3	5	0	0	0	0.991	1.009	ENSMUSG00000025574	-0.31	-5	0.62	0	1	0.6	3	0	PG	0.819	TK1	mmBRCA(PyMT)	OG
C4b	3	5	0	0	0	0.261	0.436	ENSMUSG00000073418	-0.63	-5	0.62	0	1	0.6	3	0	PG	0.817	C4A	mmBRCA(PyMT)	OG
Mroh2a	12	5	1	9	0	0.481	0.481	ENSMUSG00000079429	-1.24	0.87	0.19	0.37	0.8	0.4	2	0.22	PG	0.807		mmBRCA(PyMT)	TSG
Prrc2c	2	6	0	0	0	0.029	0	ENSMUSG00000040225	-0.08	-5	0.75	0	1	0.67	4	0	PG	0.799	PRRC2C	mmBRCA(PyMT)	OG
Naip5	1	5	0	0	0	0.595	0.503	ENSMUSG00000071203	0.27	-5	0.83	0	1	0.6	3	0	PG	0.794		mmBRCA(PyMT)	OG
Pcdhb7	1	5	0	0	0	0.481	0.481	ENSMUSG00000045062	0.86	-5	0.83	0	1	0.6	3	0	PG	0.791	PCDHB4	mmBRCA(PyMT)	OG
Sbsn	1	6	0	0	0	0.598	0.513	ENSMUSG00000046056	0.26	-5	0.86	0	1	0.67	4	0	PG	0.781	SBSN	mmBRCA(PyMT)	OG
Naip2	2	3	0	0	0	1.151	1.151	ENSMUSG00000078945	-0.35	-5	0.6	0	1	1	3	0	PG	0.776		mmBRCA(PyMT)	OG
Olfr1076	3	3	0	0	0	0.791	0.791	ENSMUSG00000060742	-0.39	-5	0.5	0	1	1	3	0	PG	0.774		mmBRCA(PyMT)	OG
Pcdhb11	3	9	0	0	0	0.945	0.972	ENSMUSG00000051486	0.18	-5	0.75	0	0.89	0.89	8	0	PG	0.774	PCDHB5	mmBRCA(PyMT)	OG
Vmn2r98	2	3	0	0	0	0.481	0.481	ENSMUSG00000096717	-0.63	-5	0.6	0	1	1	3	0	PG	0.774		mmBRCA(PyMT)	OG
Dnah7b	3	2	0	0	0	0.65	0.65	ENSMUSG00000041144	-1.32	-5	0.4	0	1	1	2	0	PG	0.771	DNAH7	mmBRCA(PyMT)	PG
Ifi207	4	3	0	0	0	0.481	0.481	ENSMUSG00000073490	-0.7	-5	0.43	0	1	1	3	0	PG	0.771		mmBRCA(PyMT)	OG
Vmn2r85	3	2	0	0	0	0.481	0.481	ENSMUSG00000092048	-1.62	-5	0.4	0	1	1	2	0	PG	0.771		mmBRCA(PyMT)	PG
Zfp384	5	5	0	2	2	0.052	0	ENSMUSG00000038346	-0.55	-0.91	0.36	0.14	1	0.6	3	0.26	PG	0.771		mmBRCA(PyMT)	OG
Akr1b10	3	2	0	0	0	0.446	0.446	ENSMUSG00000061758	-1.15	-5	0.4	0	1	1	2	0	PG	0.769	AKR1B10	mmBRCA(PyMT)	PG
Ddx50	4	2	0	0	0	1.192	1.192	ENSMUSG00000020076	-1.79	-5	0.33	0	1	1	2	0	PG	0.769	DDX50	mmBRCA(PyMT)	PG
Gm8897	5	3	0	0	0	0.481	0.481	ENSMUSG00000096732	-1.3	-5	0.38	0	1	1	3	0	PG	0.769		mmBRCA(PyMT)	OG
Rnf111	1	7	0	0	0	0.53	0.356	ENSMUSG00000032217	1.03	-5	0.88	0	1	0.43	3	0	PG	0.769	RNF111	mmBRCA(PyMT)	OG
Trav13-1	2	4	0	0	0	0.481	0.481	ENSMUSG00000076839	-0.64	-5	0.67	0	1	1	4	0	PG	0.769		mmBRCA(PyMT)	OG
Ugt2b38	3	2	0	0	0	0.41	0.41	ENSMUSG00000061906	-1.08	-5	0.4	0	1	1	2	0	PG	0.769	UGT2B4	mmBRCA(PyMT)	PG
Zfp937	5	3	0	0	0	0.481	0.481	ENSMUSG00000060336	-1.16	-5	0.38	0	1	1	3	0	PG	0.769		mmBRCA(PyMT)	OG
2610301B20Rik	5	2	0	0	0	0.481	0.481	ENSMUSG00000059482	-1.53	-5	0.29	0	1	1	2	0	PG	0.766	C8orf37	mmBRCA(PyMT)	PG
Gm13084	3	4	0	0	0	0.481	0.481	ENSMUSG00000059218	-0.66	-5	0.57	0	1	1	4	0	PG	0.766		mmBRCA(PyMT)	OG
Gm13119	6	2	0	0	0	0.481	0.481	ENSMUSG00000070619	-1.67	-5	0.25	0	1	1	2	0	PG	0.766	PRAMEF4	mmBRCA(PyMT)	PG
Gm7298	6	2	0	0	0	0.481	0.481	ENSMUSG00000108022	-1.77	-5	0.25	0	1	1	2	0	PG	0.766		mmBRCA(PyMT)	PG
Krtap16-3	7	3	0	0	0	1.063	1.063	ENSMUSG00000096534	-1.71	-5	0.3	0	1	1	3	0	PG	0.766	KRTAP19-1	mmBRCA(PyMT)	OG
Olfr1564	6	2	0	0	0	0.481	0.481	ENSMUSG00000096169	-2.04	-5	0.25	0	1	1	2	0	PG	0.766		mmBRCA(PyMT)	PG
Olfr195	4	2	0	0	0	1.335	1.335	ENSMUSG00000062608	-1.18	-5	0.33	0	1	1	2	0	PG	0.766	OR5K3	mmBRCA(PyMT)	PG
Polr2a	25	2	0	0	0	0.343	0.343	ENSMUSG00000005198	-3.38	-5	0.07	0	1	1	2	0	PG	0.766		mmBRCA(PyMT)	PG
Serpina1a	4	2	0	0	0	1.462	1.462	ENSMUSG00000066366	-1.51	-5	0.33	0	1	1	2	0	PG	0.766		mmBRCA(PyMT)	PG
Vmn2r60	19	3	0	0	0	0.481	0.481	ENSMUSG00000090619	-3	-5	0.14	0	1	1	3	0	PG	0.766		mmBRCA(PyMT)	PG
Gm39115	1	2	0	0	3	0.355	0.355	ENSMUSG00000110091	-0.32	-5	0.33	0	1	1	2	0	PG	0.764	KRTAP5-3	mmBRCA(PyMT)	PG
Pcdhb14	7	3	0	0	0	0.65	0.65	ENSMUSG00000044043	-1.22	-5	0.3	0	1	1	3	0	PG	0.764	PCDHB11	mmBRCA(PyMT)	OG
Adam6b	1	4	0	0	0	0.481	0.481	ENSMUSG00000051804	0.68	-5	0.8	0	1	1	4	0	PG	0.761		mmBRCA(PyMT)	OG
Ankrd35	6	2	0	0	0	0	0	ENSMUSG00000038354	-2.1	-5	0.25	0	1	1	2	0	PG	0.761	ANKRD35	mmBRCA(PyMT)	PG
Catspere2	1	4	0	0	0	0.481	0.481	ENSMUSG00000091476	-0.25	-5	0.8	0	1	1	4	0	PG	0.761	C1orf101	mmBRCA(PyMT)	OG
Orm2	2	3	0	0	0	1.798	1.798	ENSMUSG00000061540	-0.24	-5	0.6	0	1	1	3	0	PG	0.761	ORM2	mmBRCA(PyMT)	OG
Spata31d1b	1	4	0	0	0	0.481	0.481	ENSMUSG00000091311	0.66	-5	0.8	0	1	1	4	0	PG	0.761		mmBRCA(PyMT)	OG
Odc1	6	3	0	0	0	0.084	0.084	ENSMUSG00000011179	-1.67	-5	0.33	0	1	1	3	0	PG	0.759	ODC1	mmBRCA(PyMT)	OG
Nr1d2	9	4	0	0	0	0.481	0.481	ENSMUSG00000021775	-1.45	-5	0.31	0	1	1	4	0	PG	0.756	NR1D2	mmBRCA(PyMT)	OG
Ovgp1	10	4	0	0	0	0.481	0.481	ENSMUSG00000074340	-2.14	-5	0.29	0	1	1	4	0	PG	0.756	OVGP1	mmBRCA(PyMT)	OG
Tarbp2	7	4	0	0	0	0.2	0.2	ENSMUSG00000023051	-1.08	-5	0.36	0	1	1	4	0	PG	0.756	TARBP2	mmBRCA(PyMT)	OG
Olfr1502	3	9	0	0	0	0.569	0.642	ENSMUSG00000056858	0.43	-5	0.75	0	1	0.56	5	0	PG	0.731	OR9I1	mmBRCA(PyMT)	OG
Casc4	3	10	0	0	0	0.18	0	ENSMUSG00000060227	0.43	-5	0.77	0	1	0.5	5	0	PG	0.726	CASC4	mmBRCA(PyMT)	OG
Gm7247	3	10	0	1	0	0.481	0.481	ENSMUSG00000068399	-0.52	-0.9	0.71	0.07	0.9	0.9	9	0.98	PG	0.706		mmBRCA(PyMT)	OG
9830107B12Rik	7	10	0	0	0	0.481	0.481	ENSMUSG00000073386	-0.54	-5	0.59	0	0.9	0.9	9	0	PG	0.693		mmBRCA(PyMT)	OG
Siah1a	5	11	0	6	0	0.055	0.051	ENSMUSG00000036840	-0.03	0.81	0.5	0.27	1	0.45	5	0.8	PG	0.693		mmBRCA(PyMT)	TSG
Thrap3	3	9	0	0	0	0.374	0.481	ENSMUSG00000043962	0.13	-5	0.75	0	1	0.78	7	0	PG	0.693	THRAP3	mmBRCA(PyMT)	OG
Ugt1a9	19	25	3	0	0	0.926	0.76	ENSMUSG00000090175	-0.68	0.51	0.53	0.06	1	0.44	11	0.42	PG	0.693	UGT1A8	mmBRCA(PyMT)	OG
Nadk	0	5	0	0	0	0.774	0.894	ENSMUSG00000029063	5	-5	1	0	0.8	0.8	4	0	PG	0.686	NADK	mmBRCA(PyMT)	OG
Pcdhb9	3	6	0	0	0	0.481	0.481	ENSMUSG00000051242	-0.01	-5	0.67	0	1	1	6	0	PG	0.686	PCDHB4	mmBRCA(PyMT)	OG
Hspd1	3	5	0	0	0	0	0	ENSMUSG00000025980	-0.47	-5	0.62	0	1	1	5	0	PG	0.683	HSPD1	mmBRCA(PyMT)	OG
Rpap2	2	5	0	0	0	0	0	ENSMUSG00000033773	0.33	-5	0.71	0	1	1	5	0	PG	0.683	RPAP2	mmBRCA(PyMT)	OG
Rplp0	9	5	0	0	0	0.457	0.457	ENSMUSG00000067274	-1.09	-5	0.36	0	1	1	5	0	PG	0.681	RPLP0	mmBRCA(PyMT)	OG
Smad5	4	16	0	0	0	0.125	0.082	ENSMUSG00000021540	0.34	-5	0.8	0	1	0.5	8	0	PG	0.666	SMAD5	mmBRCA(PyMT)	OG
Krtap1-3	3	7	0	0	1	0.83	0.83	ENSMUSG00000078131	0.29	-5	0.64	0	1	1	7	0	PG	0.663	KRTAP1-3	mmBRCA(PyMT)	OG
Olfr192	6	7	0	0	0	0.481	0.481	ENSMUSG00000108464	-0.78	-5	0.54	0	1	1	7	0	PG	0.658		mmBRCA(PyMT)	OG
Olfr583	3	11	0	0	0	0.749	0.695	ENSMUSG00000073960	0.54	-5	0.79	0	0.91	0.91	10	0	PG	0.658		mmBRCA(PyMT)	OG
Cyp4a10	5	7	0	0	0	1.332	1.332	ENSMUSG00000066072	-0.92	-5	0.58	0	1	1	7	0	PG	0.656	CYP4A11	mmBRCA(PyMT)	OG
Atp1b3	6	7	0	0	0	2.07	2.07	ENSMUSG00000032412	-0.74	-5	0.54	0	1	1	7	0	PG	0.646	ATP1B3	mmBRCA(PyMT)	OG
Lce3c	4	8	0	0	0	0.252	0.252	ENSMUSG00000045475	-0.78	-5	0.67	0	1	1	8	0	PG	0.643	LCE3B	mmBRCA(PyMT)	OG
Gsdmc3	13	8	0	0	0	1.508	1.508	ENSMUSG00000055827	-1.29	-5	0.38	0	1	1	8	0	PG	0.638	GSDMC	mmBRCA(PyMT)	OG
Vmn2r20	1	6	0	0	0	0.481	0.481	ENSMUSG00000094145	0.54	-5	0.86	0	1	1	6	0	PG	0.638		mmBRCA(PyMT)	OG
Mrgpra4	3	14	0	0	0	0.481	0.481	ENSMUSG00000067173	1.1	-5	0.82	0	1	0.43	6	0	PG	0.636		mmBRCA(PyMT)	OG
Slc35a4	2	8	0	0	0	0.196	0.196	ENSMUSG00000033272	0.48	-5	0.8	0	1	1	8	0	PG	0.616		mmBRCA(PyMT)	OG
Larp1	6	13	0	0	0	0.047	0.041	ENSMUSG00000037331	0.08	-5	0.68	0	0.92	0.92	12	0	PG	0.603	LARP1	mmBRCA(PyMT)	OG
Mrgprx1	0	4	0	0	1	0.625	0.625	ENSMUSG00000070552	5	-5	0.8	0	1	1	4	0	PG	0.598	MRGPRX1	mmBRCA(PyMT)	OG
Ewsr1	0	6	0	0	0	0.481	0.481	ENSMUSG00000009079	5	-5	1	0	0.83	0.83	5	0	PG	0.56	178	mmBRCA(PyMT)	OG
Psmb5	20	29	0	0	0	0.065	0.082	ENSMUSG00000022193	-0.52	-5	0.59	0	1	0.79	23	0	PG	0.56	PSMB5	mmBRCA(PyMT)	OG
Tgs1	1	6	0	0	0	1.114	1.114	ENSMUSG00000028233	1.2	-5	0.86	0	1	1	6	0	PG	0.56	TGS1	mmBRCA(PyMT)	OG
Krtap4-2	3	10	0	0	1	1.256	1.256	ENSMUSG00000044649	0.16	-5	0.71	0	1	1	10	0	PG	0.558	KRTAP4-8	mmBRCA(PyMT)	OG
Taar7b	3	9	0	0	0	0.481	0.481	ENSMUSG00000095171	0.08	-5	0.75	0	1	1	9	0	PG	0.558		mmBRCA(PyMT)	OG
Cstf2t	5	11	0	0	2	1.096	1.096	ENSMUSG00000053536	-0.14	-5	0.61	0	1	1	11	0	PG	0.555	CSTF2T	mmBRCA(PyMT)	OG
Cyp2c54	12	10	0	0	0	0.481	0.481	ENSMUSG00000067225	-1.1	-5	0.45	0	1	1	10	0	PG	0.553		mmBRCA(PyMT)	OG
Vmn1r78	15	10	0	0	0	0.481	0.481	ENSMUSG00000061602	-1.15	-5	0.4	0	1	1	10	0	PG	0.553		mmBRCA(PyMT)	OG
Serpinb3d	0	7	0	0	0	0.496	0.305	ENSMUSG00000058017	5	-5	1	0	0.86	0.86	6	0	PG	0.52	SERPINB3	mmBRCA(PyMT)	OG
Ppcs	14	30	0	0	0	0.481	0.481	ENSMUSG00000028636	-0.06	-5	0.68	0	1	1	30	0	PG	0.513	PPCS	mmBRCA(PyMT)	OG
Olfr944	11	16	0	0	0	0.481	0.481	ENSMUSG00000096555	-0.75	-5	0.59	0	1	1	16	0	PG	0.51		mmBRCA(PyMT)	OG
Aim2	0	18	1	0	0	1.004	1.209	ENSMUSG00000037860	4.9	5	0.95	0.05	1	0.56	10	0.61	PG	0.49	AIM2	mmBRCA(PyMT)	OG
Vmn2r112	1	17	0	1	2	0.481	0.481	ENSMUSG00000094921	4	-1.5	0.81	0.05	0.94	0.53	9	0.61	PG	0.452		mmBRCA(PyMT)	OG
Arcn1	1	16	14	0	0	0.07	0	ENSMUSG00000032096	2.76	5	0.52	0.45	1	0.44	7	0.05	TSG	0.932	ARCN1	mmBRCA(PyMT)	TSG
Vmn2r28	1	15	7	0	0	0.481	0.481	ENSMUSG00000066820	2.92	5	0.65	0.3	0.87	0.53	8	0.56	TSG	0.917		mmBRCA(PyMT)	TSG
Calr	0	0	7	0	0	0.481	0.481	ENSMUSG00000003814	-5	5	0	1	0	0	0	0.53	TSG	0.91	68	mmBRCA(PyMT)	TSG
Cd244a	0	0	0	5	0	0.481	0.481	ENSMUSG00000004709	-2.1	5	0	1	0	0	0	0.49	TSG	0.91		mmBRCA(PyMT)	TSG
Foxn2	1	0	0	7	0	0.481	0.481	ENSMUSG00000034998	-5	3.54	0	0.88	0	0	0	0.26	TSG	0.892	FOXN2	mmBRCA(PyMT)	TSG
Ptpdc1	0	2	0	4	0	0.513	0.513	ENSMUSG00000038042	5	3.54	0.33	0.67	1	1	2	0.56	TSG	0.892	PTPDC1	mmBRCA(PyMT)	TSG
Ugcg	0	0	0	6	0	0.481	0.481	ENSMUSG00000028381	-2.1	5	0	1	0	0	0	0.98	TSG	0.877	UGCG	mmBRCA(PyMT)	TSG
Coq2	2	8	7	0	0	0.529	0.643	ENSMUSG00000029319	0.79	3.41	0.47	0.41	1	0.75	6	0.99	TSG	0.842	COQ2	mmBRCA(PyMT)	TSG
Gcsh	0	0	6	0	0	0.481	0.481	ENSMUSG00000034424	-5	5	0	1	0	0	0	0.01	TSG	0.842	GCSH	mmBRCA(PyMT)	TSG
Ifi209	9	38	15	0	0	0.481	0.481	ENSMUSG00000043263	0.74	4.46	0.61	0.24	0.97	0.82	31	0.96	TSG	0.766		mmBRCA(PyMT)	TSG
Chuk	0	4	1	0	0	0.581	0.684	ENSMUSG00000025199	2.85	5	0.8	0.2	0.75	0.75	3	0.65	TSG	0.759	CHUK	mmBRCA(PyMT)	OG
Gm12185	3	0	2	0	0	0.481	0.481	ENSMUSG00000048852	-5	2.32	0	0.4	0	0	0	0.99	TSG	0.691		mmBRCA(PyMT)	TSG
Nme2	0	16	3	0	0	0.635	0.635	ENSMUSG00000020857	4.06	5	0.84	0.16	1	1	16	0.8	TSG	0.628		mmBRCA(PyMT)	OG
Obox5	0	9	1	0	0	0.481	0.481	ENSMUSG00000074366	5	4.9	0.9	0.1	0.89	0.89	8	0.78	TSG	0.575		mmBRCA(PyMT)	OG
Olfr635	2	2	1	0	0	0.686	0.686	ENSMUSG00000094520	-1.21	2.22	0.4	0.2	1	1	2	0.93	TSG	0.558	OR51Q1	mmBRCA(PyMT)	PG
Vmn2r72	0	16	1	0	0	0.481	0.481	ENSMUSG00000051877	5	4.45	0.94	0.06	1	0.75	12	0.03	TSG	0.525		mmBRCA(PyMT)	OG
H2-K1	0	12	0	0	0	0.31	0.31	ENSMUSG00000061232	5	-4.98	1	0	1	1	12	0	OG	0.98	HLA-B	mmBRCA(Her2)	OG
Pcdhb18	0	18	0	0	0	0.678	0.678	ENSMUSG00000048347	5	-4.98	1	0	1	1	18	0	OG	0.97	PCDHB10	mmBRCA(Her2)	OG
Sap30bp	0	9	0	0	0	0	0	ENSMUSG00000020755	5	-5	1	0	1	1	9	0	OG	0.967	SAP30BP	mmBRCA(Her2)	OG
Ube2q2	0	11	0	0	0	0.067	0.067	ENSMUSG00000032307	5	-5	1	0	1	1	11	0	OG	0.965	UBE2Q2	mmBRCA(Her2)	OG
Olfr213	0	9	0	0	0	0.554	0.554	ENSMUSG00000081649	5	-4.99	1	0	1	1	9	0	OG	0.942		mmBRCA(Her2)	OG
Trav14-1	0	11	0	0	0	0.554	0.554	ENSMUSG00000076840	5	-5	1	0	1	1	11	0	OG	0.942		mmBRCA(Her2)	OG
Naip2	0	11	0	0	0	0.781	0.781	ENSMUSG00000078945	5	-5	1	0	1	1	11	0	OG	0.937		mmBRCA(Her2)	OG
AY358078	0	25	0	0	0	0.554	0.554	ENSMUSG00000050961	5	-5	1	0	1	0.8	20	0	OG	0.852		mmBRCA(Her2)	OG
Gm14443	0	16	0	0	0	0.554	0.554	ENSMUSG00000078902	5	-5	1	0	1	0.75	12	0	OG	0.852		mmBRCA(Her2)	OG
Pdcd10	0	7	0	0	0	0	0	ENSMUSG00000027835	5	-5	1	0	1	1	7	0	OG	0.847		mmBRCA(Her2)	OG
Ss18	0	7	0	0	0	0.183	0.183	ENSMUSG00000037013	5	-5	1	0	1	1	7	0	OG	0.834	SS18	mmBRCA(Her2)	OG
Bud31	0	8	0	0	0	0.271	0.271	ENSMUSG00000038722	5	-5	1	0	1	1	8	0	OG	0.822	BUD31	mmBRCA(Her2)	OG
4930449I24Rik	0	7	0	0	0	0.554	0.554	ENSMUSG00000079093	5	-5	1	0	1	1	7	0	OG	0.809		mmBRCA(Her2)	OG
Klra9	0	18	0	0	0	0.554	0.554	ENSMUSG00000033024	5	-5	1	0	1	0.61	11	0	OG	0.809		mmBRCA(Her2)	OG
H2-Q4	0	13	0	0	0	1.159	1.225	ENSMUSG00000035929	5	-5	1	0	0.92	0.92	12	0	OG	0.779	HLA-B	mmBRCA(Her2)	OG
Paip1	0	6	0	0	0	0	0	ENSMUSG00000025451	5	-5	1	0	1	1	6	0	OG	0.769	PAIP1	mmBRCA(Her2)	OG
Ndufc2	0	5	0	0	0	0.119	0.119	ENSMUSG00000030647	5	-4.98	1	0	1	1	5	0	OG	0.751	NDUFC2	mmBRCA(Her2)	OG
Naip5	0	6	0	0	0	0.503	0.503	ENSMUSG00000071203	5	-5	1	0	1	1	6	0	OG	0.734		mmBRCA(Her2)	OG
Ppig	0	6	0	0	0	0.557	0.557	ENSMUSG00000042133	5	-5	1	0	1	1	6	0	OG	0.734	PPIG	mmBRCA(Her2)	OG
Psg17	0	6	0	0	0	0.554	0.554	ENSMUSG00000004540	5	-5	1	0	1	1	6	0	OG	0.734		mmBRCA(Her2)	OG
Lama2	0	5	0	0	0	0.407	0.407	ENSMUSG00000019899	5	-5	1	0	1	1	5	0	OG	0.726	LAMA2	mmBRCA(Her2)	OG
Zfp874b	0	5	0	0	0	0.554	0.554	ENSMUSG00000059839	5	-5	1	0	1	1	5	0	OG	0.721		mmBRCA(Her2)	OG
H2-Q10	0	5	0	0	0	1.388	1.388	ENSMUSG00000067235	5	-4.99	1	0	1	1	5	0	OG	0.714	HLA-C	mmBRCA(Her2)	OG
Olfr175	0	5	0	0	0	1.906	1.906	ENSMUSG00000060663	5	-4.6	1	0	1	1	5	0	OG	0.714	OR5K3	mmBRCA(Her2)	OG
Zfp982	2	31	0	0	0	0.554	0.554	ENSMUSG00000078496	4	-5	0.94	0	1	0.84	26	0	OG	0.691		mmBRCA(Her2)	OG
Klra1	0	6	0	0	0	0.554	0.554	ENSMUSG00000079853	5	-5	1	0	1	0.5	3	0	OG	0.505		mmBRCA(Her2)	OG
Adam6b	5	0	0	0	0	0.554	0.554	ENSMUSG00000051804	-5	-5	0	0	0	0	0	0	PG	0.985		mmBRCA(Her2)	PG
Ccnd3	9	0	0	0	5	0.554	0.554	ENSMUSG00000034165	-5	-5	0	0	0	0	0	0	PG	0.985	86	mmBRCA(Her2)	PG
Lama4	5	0	0	0	0	0.554	0.554	ENSMUSG00000019846	-4.95	-5	0	0	0	0	0	0	PG	0.985		mmBRCA(Her2)	PG
Olfr1028	8	0	0	0	0	0.554	0.554	ENSMUSG00000057207	-5	-5	0	0	0	0	0	0	PG	0.985	OR5M10	mmBRCA(Her2)	PG
Olfr1348	11	0	0	0	0	0.554	0.554	ENSMUSG00000093877	-5	-5	0	0	0	0	0	0	PG	0.985		mmBRCA(Her2)	PG
Olfr212	12	0	0	0	0	0.554	0.554	ENSMUSG00000053251	-5	-5	0	0	0	0	0	0	PG	0.985		mmBRCA(Her2)	PG
Pcdhb9	6	0	0	0	0	0.554	0.554	ENSMUSG00000051242	-5	-5	0	0	0	0	0	0	PG	0.985	PCDHB4	mmBRCA(Her2)	PG
Ptprs	5	0	0	0	0	0.554	0.554	ENSMUSG00000013236	-5	-5	0	0	0	0	0	0	PG	0.985	PTPRS	mmBRCA(Her2)	PG
Rpsa	15	0	0	0	0	0.554	0.554	ENSMUSG00000032518	-5	-5	0	0	0	0	0	0	PG	0.985	RPSA	mmBRCA(Her2)	PG
Vmn2r54	6	0	0	0	0	0.554	0.554	ENSMUSG00000096593	-5	-5	0	0	0	0	0	0	PG	0.985		mmBRCA(Her2)	PG
Armh4	2	5	0	0	0	0.19	0.19	ENSMUSG00000036242	-0.23	-5	0.71	0	0.8	0.8	4	0	PG	0.972	C14orf37	mmBRCA(Her2)	OG
Myh6	8	1	0	0	0	0.736	0.736	ENSMUSG00000040752	-2.75	-5	0.11	0	0	1	0	0	PG	0.972		mmBRCA(Her2)	PG
Cmya5	4	1	0	0	0	0.558	0.558	ENSMUSG00000047419	-1.98	-5	0.2	0	0	1	0	0	PG	0.97	CMYA5	mmBRCA(Her2)	PG
Klra4	4	1	0	0	0	0.554	0.554	ENSMUSG00000079852	-1.89	-5	0.2	0	0	1	0	0	PG	0.97		mmBRCA(Her2)	PG
Obscn	3	1	0	0	2	1.371	1.371	ENSMUSG00000061462	-1.75	-5	0.17	0	0	1	0	0	PG	0.965	OBSCN	mmBRCA(Her2)	PG
Olfr193	4	1	0	0	0	1.282	1.282	ENSMUSG00000060057	-1.92	-5	0.2	0	0	1	0	0	PG	0.965	OR5H15	mmBRCA(Her2)	PG
Clpx	0	0	0	0	7	0.554	0.554	ENSMUSG00000015357	2.85	0	0	0	0	0	0	0	PG	0.945	CLPX	mmBRCA(Her2)	PG
Cox8a	0	0	0	0	6	0.554	0.554	ENSMUSG00000035885	2.85	0	0	0	0	0	0	0	PG	0.945	COX8A	mmBRCA(Her2)	PG
Nup54	0	0	0	0	10	0.554	0.554	ENSMUSG00000034826	2.85	0	0	0	0	0	0	0	PG	0.945	NUP54	mmBRCA(Her2)	PG
Tob1	0	0	0	0	6	0.554	0.554	ENSMUSG00000037573	2.85	0	0	0	0	0	0	0	PG	0.945		mmBRCA(Her2)	PG
Zfp282	0	0	0	0	7	0.554	0.554	ENSMUSG00000025821	2.85	0	0	0	0	0	0	0	PG	0.945	ZNF282	mmBRCA(Her2)	PG
Cherp	0	1	0	0	4	0.117	0.117	ENSMUSG00000052488	5	-5	0.2	0	0	1	0	0	PG	0.882	CHERP	mmBRCA(Her2)	PG
Eif3j1	0	0	0	1	4	0.554	0.554	ENSMUSG00000027236	1.25	0	0	0.2	0	0	0	0.02	PG	0.842	EIF3J	mmBRCA(Her2)	PG
Itln1	16	4	0	0	0	0.618	1.05	ENSMUSG00000038209	-2.8	-5	0.2	0	1	0.5	2	0	PG	0.819	ITLN1	mmBRCA(Her2)	PG
2410141K09Rik	5	12	1	0	0	0.554	0.554	ENSMUSG00000074832	-0.27	-0.46	0.67	0.06	0.92	0.33	4	0.47	PG	0.812		mmBRCA(Her2)	OG
H2-T23	3	3	0	0	0	0.812	0.812	ENSMUSG00000067212	-0.51	-5	0.5	0	1	1	3	0	PG	0.779	HLA-E	mmBRCA(Her2)	OG
Olfr92	3	3	0	0	0	1.347	1.347	ENSMUSG00000096477	-1.16	-5	0.5	0	1	1	3	0	PG	0.774		mmBRCA(Her2)	OG
Olfr836	4	3	0	0	0	0.554	0.554	ENSMUSG00000059303	-0.92	-5	0.43	0	1	1	3	0	PG	0.771		mmBRCA(Her2)	OG
Zfp455	4	3	0	0	0	0.554	0.554	ENSMUSG00000051037	-1.56	-5	0.43	0	1	1	3	0	PG	0.771		mmBRCA(Her2)	OG
Zfp458	3	2	0	0	0	0.554	0.554	ENSMUSG00000055480	-1.16	-5	0.4	0	1	1	2	0	PG	0.771		mmBRCA(Her2)	PG
Mtmr2	3	3	0	0	0	0	0	ENSMUSG00000031918	-1.41	-5	0.5	0	1	1	3	0	PG	0.769	MTMR2	mmBRCA(Her2)	OG
Prrc2c	2	3	0	0	0	0	0	ENSMUSG00000040225	-0.59	-5	0.6	0	1	1	3	0	PG	0.769	PRRC2C	mmBRCA(Her2)	OG
Rab5a	2	3	0	0	0	0.093	0.093	ENSMUSG00000017831	-0.37	-5	0.6	0	1	1	3	0	PG	0.769	RAB5A	mmBRCA(Her2)	OG
Ppp2r5a	3	4	0	0	0	0.554	0.554	ENSMUSG00000026626	-0.23	-5	0.57	0	1	1	4	0	PG	0.766	PPP2R5A	mmBRCA(Her2)	OG
Calcoco2	6	3	0	0	0	0.554	0.554	ENSMUSG00000006056	-1.73	-5	0.33	0	1	1	3	0	PG	0.764		mmBRCA(Her2)	OG
Cdc5l	5	4	0	0	0	0.288	0.288	ENSMUSG00000023932	-1.22	-5	0.44	0	1	1	4	0	PG	0.761	CDC5L	mmBRCA(Her2)	OG
Cfh	2	3	0	0	0	2.269	2.269	ENSMUSG00000026365	-0.38	-5	0.6	0	1	1	3	0	PG	0.761	CFH	mmBRCA(Her2)	OG
Trav7-1	1	4	0	0	0	0.554	0.554	ENSMUSG00000104620	0.9	-5	0.8	0	1	1	4	0	PG	0.756		mmBRCA(Her2)	OG
Gm5592	3	9	0	0	0	0.554	0.554	ENSMUSG00000072259	0.38	-5	0.75	0	1	0.67	6	0	PG	0.731		mmBRCA(Her2)	OG
Mrgprx1	1	8	0	0	1	0.614	0.618	ENSMUSG00000070552	1.41	-5	0.8	0	0.88	0.88	7	0	PG	0.716	MRGPRX1	mmBRCA(Her2)	OG
Mrgpra6	2	7	0	0	0	0.554	0.554	ENSMUSG00000052303	0.38	-5	0.78	0	1	0.71	5	0	PG	0.706		mmBRCA(Her2)	OG
Olfr328	3	5	0	0	0	0.554	0.554	ENSMUSG00000057654	0.21	-5	0.62	0	1	1	5	0	PG	0.688		mmBRCA(Her2)	OG
Vmn1r75	3	5	0	0	0	0.554	0.554	ENSMUSG00000043308	-0.6	-5	0.62	0	1	1	5	0	PG	0.688		mmBRCA(Her2)	OG
Mrgprb5	4	6	0	0	0	0.554	0.554	ENSMUSG00000070551	-0.72	-5	0.6	0	1	1	6	0	PG	0.683		mmBRCA(Her2)	OG
Vmn2r99	6	6	0	0	0	0.554	0.554	ENSMUSG00000090304	-0.91	-5	0.5	0	1	1	6	0	PG	0.683		mmBRCA(Her2)	OG
Pcdhb7	7	18	0	0	0	0.554	0.554	ENSMUSG00000045062	0.23	-5	0.72	0	0.94	0.61	11	0	PG	0.681	PCDHB4	mmBRCA(Her2)	OG
Fus	17	16	0	0	0	0.074	0	ENSMUSG00000030795	-1.06	-5	0.48	0	0.94	0.62	10	0	PG	0.673	219	mmBRCA(Her2)	OG
Erbb2	99	95	16	0	0	0.64	0.904	ENSMUSG00000062312	-0.78	0.26	0.45	0.08	0.98	0.32	30	0.43	PG	0.661	164	mmBRCA(Her2)	PG
H2-Q1	1	7	0	0	0	1.596	1.982	ENSMUSG00000079507	0.8	-5	0.88	0	1	0.71	5	0	PG	0.661	HLA-B	mmBRCA(Her2)	OG
Krt86	5	7	0	0	0	0.554	0.554	ENSMUSG00000067614	-0.69	-5	0.58	0	1	1	7	0	PG	0.658	KRT86	mmBRCA(Her2)	OG
Ifi207	8	7	0	0	0	0.554	0.554	ENSMUSG00000073490	-0.58	-5	0.47	0	1	1	7	0	PG	0.656		mmBRCA(Her2)	OG
Olfr1076	9	7	0	0	0	0.678	0.678	ENSMUSG00000060742	-0.67	-5	0.44	0	1	1	7	0	PG	0.656		mmBRCA(Her2)	OG
Casc4	8	18	0	2	0	0.282	0	ENSMUSG00000060227	0.1	-0.21	0.64	0.07	1	0.56	10	0.42	PG	0.651	CASC4	mmBRCA(Her2)	OG
Arcn1	0	6	0	0	1	0.14	0	ENSMUSG00000032096	5	-5	0.86	0	1	0.5	3	0	PG	0.648	ARCN1	mmBRCA(Her2)	OG
Mrgpra4	11	47	0	0	0	0.554	0.554	ENSMUSG00000067173	0.66	-5	0.81	0	0.91	0.64	30	0	PG	0.618		mmBRCA(Her2)	OG
Hdgfl1	1	5	0	0	0	0.554	0.554	ENSMUSG00000045835	1.1	-5	0.83	0	1	1	5	0	PG	0.593		mmBRCA(Her2)	OG
9830107B12Rik	11	25	0	0	0	0.554	0.554	ENSMUSG00000073386	0.02	-5	0.69	0	1	0.52	13	0	PG	0.58		mmBRCA(Her2)	OG
Gm13119	0	6	0	0	0	2.24	4.031	ENSMUSG00000070619	5	-5	1	0	1	0.33	2	0	PG	0.563	PRAMEF4	mmBRCA(Her2)	PG
Cdyl	6	15	0	0	0	0.123	0.088	ENSMUSG00000059288	0.38	-5	0.71	0	1	0.8	12	0	PG	0.56		mmBRCA(Her2)	OG
Vmn2r20	1	8	0	0	0	0.554	0.554	ENSMUSG00000094145	0.8	-5	0.89	0	1	1	8	0	PG	0.56		mmBRCA(Her2)	OG
Olfr1502	12	20	0	0	0	0.646	0.664	ENSMUSG00000056858	-0.35	-5	0.62	0	1	0.9	18	0	PG	0.553	OR9I1	mmBRCA(Her2)	OG
Olfr944	19	18	0	0	0	0.554	0.554	ENSMUSG00000096555	-1.16	-5	0.49	0	1	0.89	16	0	PG	0.55		mmBRCA(Her2)	OG
Pcdhb14	27	11	0	0	0	0.65	0.65	ENSMUSG00000044043	-1.4	-5	0.29	0	1	1	11	0	PG	0.548	PCDHB11	mmBRCA(Her2)	OG
Psg20	21	14	0	0	0	0.554	0.554	ENSMUSG00000063305	-1.54	-5	0.4	0	1	0.86	12	0	PG	0.548		mmBRCA(Her2)	OG
Pip	3	10	0	0	0	1.879	1.879	ENSMUSG00000058499	0.18	-5	0.77	0	1	1	10	0	PG	0.545	PIP	mmBRCA(Her2)	OG
Muc4	0	14	0	0	0	0.554	0.554	ENSMUSG00000079620	5	-5	1	0	0.79	0.5	7	0	PG	0.528	328	mmBRCA(Her2)	OG
Psg16	12	20	5	0	0	0.554	0.554	ENSMUSG00000066760	-0.2	1.11	0.54	0.14	1	0.6	12	0.84	PG	0.523		mmBRCA(Her2)	OG
Prss2	13	24	0	0	0	0.956	0.956	ENSMUSG00000057163	-0.78	-5	0.65	0	1	1	24	0	PG	0.518	PRSS1	mmBRCA(Her2)	OG
Pcdhb11	5	26	0	0	0	1.046	1	ENSMUSG00000051486	0.79	-5	0.84	0	1	0.85	22	0	PG	0.513	PCDHB5	mmBRCA(Her2)	OG
Ppcs	6	12	0	0	0	0.554	0.554	ENSMUSG00000028636	-0.14	-5	0.67	0	1	1	12	0	PG	0.508	PPCS	mmBRCA(Her2)	OG
Vmn1r78	41	32	0	0	0	0.554	0.554	ENSMUSG00000061602	-0.97	-5	0.44	0	1	1	32	0	PG	0.508		mmBRCA(Her2)	OG
Cyp2c54	10	12	0	0	0	0.554	0.554	ENSMUSG00000067225	-0.9	-5	0.55	0	1	1	12	0	PG	0.505		mmBRCA(Her2)	OG
Zfp65	11	12	0	0	0	0.554	0.554	ENSMUSG00000071281	-1.13	-5	0.52	0	1	1	12	0	PG	0.505		mmBRCA(Her2)	OG
Psg21	7	13	4	1	0	0.554	0.554	ENSMUSG00000070796	0.04	1.61	0.52	0.2	1	0.54	7	0.8	PG	0.5		mmBRCA(Her2)	OG
Psg19	6	13	4	0	0	0.554	0.554	ENSMUSG00000004542	0.28	1.46	0.57	0.17	1	0.85	11	0.89	PG	0.48		mmBRCA(Her2)	OG
Psg25	10	14	5	0	0	0.554	0.554	ENSMUSG00000070798	-0.19	1.32	0.48	0.17	0.93	0.93	13	0.89	PG	0.472		mmBRCA(Her2)	OG
Ugt1a9	12	25	6	0	0	1.117	1.149	ENSMUSG00000090175	-0.24	1.4	0.58	0.14	1	0.84	21	0.42	PG	0.472	UGT1A8	mmBRCA(Her2)	OG
Cdk8	0	5	0	3	0	0.094	0.094	ENSMUSG00000029635	5	3.55	0.62	0.38	1	1	5	0.86	TSG	0.859	CDK8	mmBRCA(Her2)	TSG
Chuk	0	16	6	0	0	0.53	0.684	ENSMUSG00000025199	2.67	5	0.73	0.27	1	0.62	10	0.65	TSG	0.859	CHUK	mmBRCA(Her2)	TSG
Vmn2r72	0	11	3	0	0	0.554	0.554	ENSMUSG00000051877	4.13	5	0.79	0.21	1	1	11	0.03	TSG	0.764		mmBRCA(Her2)	TSG
4930433I11Rik	0	4	1	0	0	0.554	0.554	ENSMUSG00000091692	4.17	5	0.8	0.2	0.5	0.5	2	0.96	TSG	0.693		mmBRCA(Her2)	PG
