# Supplementary material for: A Mouse-Specific Model to Detect Genes under Selection in Tumors
Source: Cancers (Basel). 2023 Oct 26;15(21):5156. doi: 10.3390/cancers15215156 (PMC10647215; doi:10.3390/cancers15215156)
Supplement: Supplementary file 1 [file cancers-15-05156-s001.zip › Supplementary Table S2.xlsx]

## Sheet: tcga-vs-mm
	Mouse (mmBRCA)								Human (TCGA-BRCA)							Comparison
	Symbol	Sel.missense	Sel.truncating	E.gene	E.summit	Prediction	Probability	Tumor	Symbol	Sel.missense	Sel.truncating	E.gene	E.summit	Prediction	Probability	PG-PG	OG-PG	TSG-TSG	TSG-PG	PG-TSG
1	Ahnak	-3.32	-5	0.481	0.481	PG	0.972	mmBRCA(PyMT)	AHNAK	0.02	0.84	0.5	0.431	PG	1	1	0	0	0	0
2	Ankrd35	-2.1	-5	0	0	PG	0.761	mmBRCA(PyMT)	ANKRD35	0.37	-5	0.076	0.076	PG	1	1	0	0	0	0
3	Armh4	-1.23	-5	0.984	0.984	PG	0.997	mmBRCA(PyMT)	C14orf37	-0.13	-5	1.261	1.261	PG	0.99	1	0	0	0	0
3	Armh4	-0.23	-5	0.19	0.19	PG	0.972	mmBRCA(Her2)	C14orf37	-0.13	-5	1.261	1.261	PG	0.99
4	Catspere2	-0.25	-5	0.481	0.481	PG	0.761	mmBRCA(PyMT)	C1orf101	4.3	5	1.738	2.565	PG	0.695	1	0	0	0	0
5	Camsap1	-2.08	-5	0.462	0.462	PG	0.987	mmBRCA(PyMT)	CAMSAP1	-0.18	-5	0.339	0.233	PG	1	1	0	0	0	0
6	Cdc5l	-1.22	-5	0.288	0.288	PG	0.761	mmBRCA(Her2)	CDC5L	0.23	1.14	0.176	0.176	PG	0.99	1	0	0	0	0
7	Cfh4	5	-5	0.481	0.481	OG	0.97	mmBRCA(PyMT)	CFH	0.31	0.42	1.373	1.61	PG	0.92	0	1	0	0	0
8	Cfh	-0.38	-5	2.269	2.269	PG	0.761	mmBRCA(Her2)	CFH	0.31	0.42	1.373	1.61	PG	0.92	1	0	0	0	0
9	Cherp	-2.28	-3.88	0	0	PG	0.905	mmBRCA(PyMT)	CHERP	0.61	0.79	0.049	0.049	PG	1	1	0	0	0	0
9	Cherp	5	-5	0.117	0.117	PG	0.882	mmBRCA(Her2)	CHERP	0.61	0.79	0.049	0.049	PG	1
10	Clpx	2.85	0	0.554	0.554	PG	0.945	mmBRCA(Her2)	CLPX	-1.24	-5	0.14	0.14	PG	1	1	0	0	0	0
11	Cmya5	-1.98	-5	0.558	0.558	PG	0.97	mmBRCA(Her2)	CMYA5	1.19	-0.17	0.568	1.169	PG	0.94	1	0	0	0	0
12	Cyp4a10	-0.92	-5	1.332	1.332	PG	0.656	mmBRCA(PyMT)	CYP4A11	-0.88	-5	1.166	1.166	PG	0.99	1	0	0	0	0
13	Dnah7b	-1.32	-5	0.65	0.65	PG	0.771	mmBRCA(PyMT)	DNAH7	0.1	1.03	0.305	0.305	PG	0.98	1	0	0	0	0
14	Eef2	5	-5	0.06	0.06	OG	0.766	mmBRCA(PyMT)	EEF2	1.37	-5	0.152	0.088	PG	0.98	0	1	0	0	0
15	Enah	-5	-5	0.481	0.481	PG	0.985	mmBRCA(PyMT)	ENAH	0.54	-5	0.158	0.158	PG	1	1	0	0	0	0
16	Glul	5	-5	0.257	0.257	OG	0.957	mmBRCA(PyMT)	GLUL	0.61	2.45	0.203	0.203	PG	0.86	0	1	0	0	0
17	Gsdmc3	-1.29	-5	1.508	1.508	PG	0.638	mmBRCA(PyMT)	GSDMC	0.26	0.12	1.456	1.511	PG	0.98	1	0	0	0	0
18	Hjurp	-0.75	-5	0.995	0.928	PG	0.98	mmBRCA(PyMT)	HJURP	5	3.91	1.999	1.999	PG	0.6	1	0	0	0	0
19	Hspd1	-0.47	-5	0	0	PG	0.683	mmBRCA(PyMT)	HSPD1	5	3.14	0.322	0.322	TSG	0.8	0	0	0	0	1
20	Itgad	5	-5	1.729	1.729	OG	0.965	mmBRCA(PyMT)	ITGAD	0.23	2.19	0.578	0.578	PG	0.905	0	1	0	0	0
21	Lama2	5	-5	0.407	0.407	OG	0.726	mmBRCA(Her2)	LAMA2	0.51	0.88	0.291	0.556	PG	1	0	1	0	0	0
21	Lama2	5	-5	0.366	0.407	OG	0.736	mmBRCA(PyMT)	LAMA2	0.51	0.88	0.291	0.556	PG	1
22	Larp1	0.08	-5	0.047	0.041	PG	0.603	mmBRCA(PyMT)	LARP1	0.08	-0.09	0.152	0.152	PG	1	1	0	0	0	0
23	Metap2	-0.31	-5	0	0	PG	0.882	mmBRCA(PyMT)	METAP2	3.56	5	0	0	TSG	0.67	0	0	0	0	1
24	Mrgprx1	1.41	-5	0.614	0.618	PG	0.716	mmBRCA(Her2)	MRGPRX1	0.73	-5	0.717	0.568	PG	0.955	1	0	0	0	0
24	Mrgprx1	5	-5	0.625	0.625	PG	0.598	mmBRCA(PyMT)	MRGPRX1	0.73	-5	0.717	0.568	PG	0.955
25	Obscn	-1.75	-5	1.371	1.371	PG	0.965	mmBRCA(Her2)	OBSCN	-0.26	0	0.692	1.039	PG	1	1	0	0	0	0
26	Olfr635	-1.21	2.22	0.686	0.686	TSG	0.558	mmBRCA(PyMT)	OR51Q1	0.34	-5	0.571	0.534	PG	0.99	0	0	0	1	0
27	Olfr488	-0.64	-5	0.747	0.653	PG	0.992	mmBRCA(PyMT)	OR5P2	5	-5	0.84	0.761	PG	0.83	1	0	0	0	0
28	Pcdha7	-5	-5	0.481	0.481	PG	0.985	mmBRCA(PyMT)	PCDHA7	0.77	-5	0.487	0.287	PG	0.98	1	0	0	0	0
29	Pcdhb18	5	-4.98	0.678	0.678	OG	0.97	mmBRCA(Her2)	PCDHB10	-0.04	-5	0.586	0.952	PG	1	0	1	0	0	0
29	Pcdhb18	5	-5	0.555	0.555	OG	0.721	mmBRCA(PyMT)	PCDHB10	-0.04	-5	0.586	0.952	PG	1
30	Pcdhb14	-1.22	-5	0.65	0.65	PG	0.764	mmBRCA(PyMT)	PCDHB11	-0.44	-5	0.721	0.622	PG	1	1	0	0	0	0
30	Pcdhb14	-1.4	-5	0.65	0.65	PG	0.548	mmBRCA(Her2)	PCDHB11	-0.44	-5	0.721	0.622	PG	1
31	Pcdhb9	-0.01	-5	0.481	0.481	PG	0.686	mmBRCA(PyMT)	PCDHB4	0.45	1.63	0.773	0.908	PG	0.995	1	0	0	0	0
31	Pcdhb9	-5	-5	0.554	0.554	PG	0.985	mmBRCA(Her2)	PCDHB4	0.45	1.63	0.773	0.908	PG	0.995
32	Pcdhb7	0.86	-5	0.481	0.481	PG	0.791	mmBRCA(PyMT)	PCDHB4	0.45	1.63	0.773	0.908	PG	0.995	1	0	0	0	0
32	Pcdhb7	0.23	-5	0.554	0.554	PG	0.681	mmBRCA(Her2)	PCDHB4	0.45	1.63	0.773	0.908	PG	0.995
33	Pcdhb11	0.79	-5	1.046	1	PG	0.513	mmBRCA(Her2)	PCDHB5	-0.78	0.54	0.595	0.595	PG	1	1	0	0	0	0
33	Pcdhb11	0.18	-5	0.945	0.972	PG	0.774	mmBRCA(PyMT)	PCDHB5	-0.78	0.54	0.595	0.595	PG	1
34	Ppig	5	-5	0.557	0.557	OG	0.734	mmBRCA(Her2)	PPIG	-0.33	1.35	0.116	0.116	PG	1	0	1	0	0	0
35	Gm13119	5	-5	2.24	4.031	PG	0.563	mmBRCA(Her2)	PRAMEF4	0.76	0.27	0.537	0	PG	0.985	1	0	0	0	0
35	Gm13119	-1.67	-5	0.481	0.481	PG	0.766	mmBRCA(PyMT)	PRAMEF4	0.76	0.27	0.537	0	PG	0.985
36	Prrc2c	-0.08	-5	0.029	0	PG	0.799	mmBRCA(PyMT)	PRRC2C	1.87	2.04	0.206	0.206	PG	0.825	1	0	0	0	0
36	Prrc2c	-0.59	-5	0	0	PG	0.769	mmBRCA(Her2)	PRRC2C	1.87	2.04	0.206	0.206	PG	0.825
37	Ptpdc1	5	3.54	0.513	0.513	TSG	0.892	mmBRCA(PyMT)	PTPDC1	-0.1	2.14	0.706	0.706	TSG	0.575	0	0	1	0	0
38	Rpap2	0.33	-5	0	0	PG	0.683	mmBRCA(PyMT)	RPAP2	-1.15	-0.03	0.761	0.761	PG	0.985	1	0	0	0	0
39	Ryr1	-5	-2.09	0.481	0.481	PG	0.889	mmBRCA(PyMT)	RYR1	0.02	-5	0.203	0	PG	1	1	0	0	0	0
40	Serpinb3d	5	-5	0.496	0.305	PG	0.52	mmBRCA(PyMT)	SERPINB3	5	-5	0.438	0.863	PG	0.89	1	0	0	0	0
41	Tarbp2	-1.08	-5	0.2	0.2	PG	0.756	mmBRCA(PyMT)	TARBP2	-0.97	1.89	0.537	0.537	PG	0.64	1	0	0	0	0
45	Tgs1	1.2	-5	1.114	1.114	PG	0.56	mmBRCA(PyMT)	TGS1	0.82	1.31	0.652	0.647	PG	0.99	1	0	0	0	0
43	Thrap3	0.13	-5	0.374	0.481	PG	0.693	mmBRCA(PyMT)	THRAP3	5	-4.99	0.25	0.479	PG	0.98	1	0	0	0	0
44	Ugt1a1	-4.95	-5	0.481	0.481	PG	0.985	mmBRCA(PyMT)	UGT1A1	-1.2	-5	0.294	0.294	PG	0.995	1	0	0	0	0
45	Zfp69	-5	-5	0.481	0.481	PG	0.985	mmBRCA(PyMT)	ZFP69	0.48	-5	2.811	6.396	PG	0.935	1	0	0	0	0
