# Supplementary material for: A Mouse-Specific Model to Detect Genes under Selection in Tumors
Source: Cancers (Basel). 2023 Oct 26;15(21):5156. doi: 10.3390/cancers15215156 (PMC10647215; doi:10.3390/cancers15215156)
Supplement: Supplementary file 1 [file cancers-15-05156-s001.zip › Supplementary Table S3.xlsx]

## Sheet: mmLUAD.predictions
Symbol	Silent	Missense	Nonsense	Indel.fs	Indel.inframe	E.gene	E.summit	Ensembl.gene	Sel.missense	Sel.truncating	R.missense	R.truncating	R.peak	R.summit	C.summit	R.length	GUST.pred	GUST.prob	Human.Ortholog	Tumor
Kras	0	5	0	0	0	0	0	ENSMUSG00000030265	5	-5	1	0	1	0.6	3	0	OG	0.573	KRAS	mmLUAD
Rrs1	0	6	0	0	0	0.034	0	ENSMUSG00000061024	5	-5	1	0	0.67	0.67	4	0	PG	0.628	RRS1	mmLUAD
